# Supplementary figures and images for: Influence of Grafting on Rootstock Rhizosphere Microbiome Assembly in Rosa sp. ‘Natal Brier’
Source: MDPI journal article supplement (doi:10.3390/biology12050663), 2023-04-27

a) Compartment

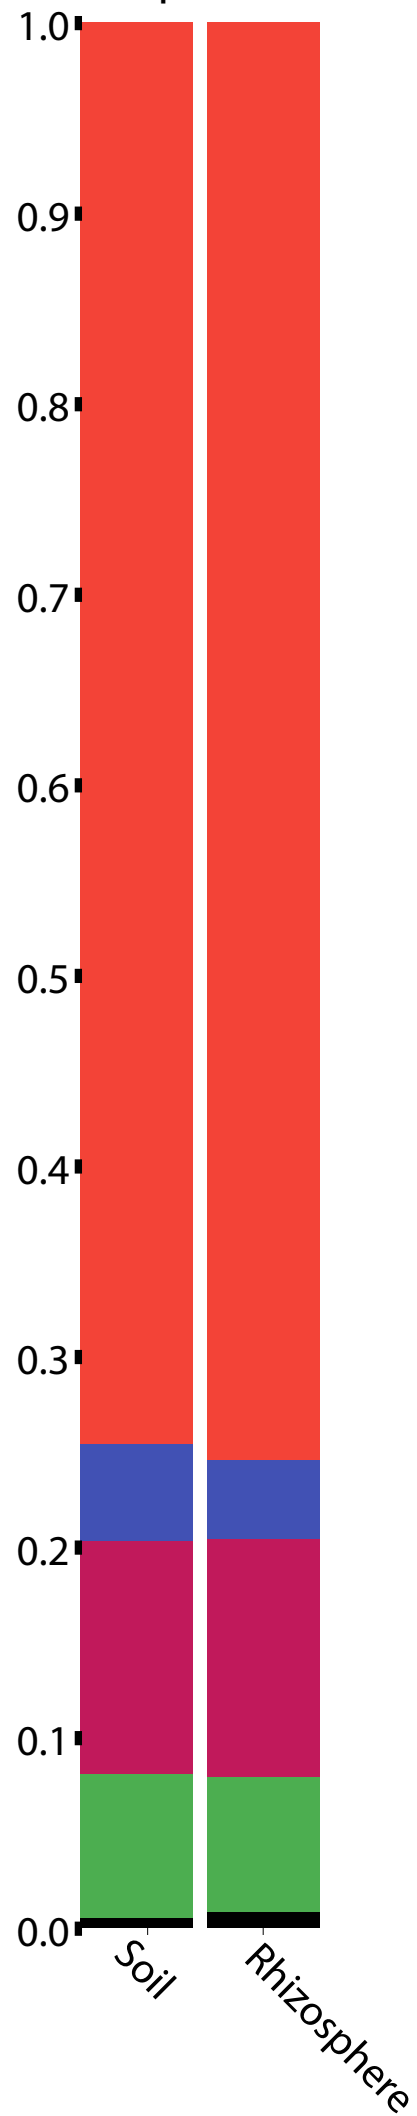

b) Grafting

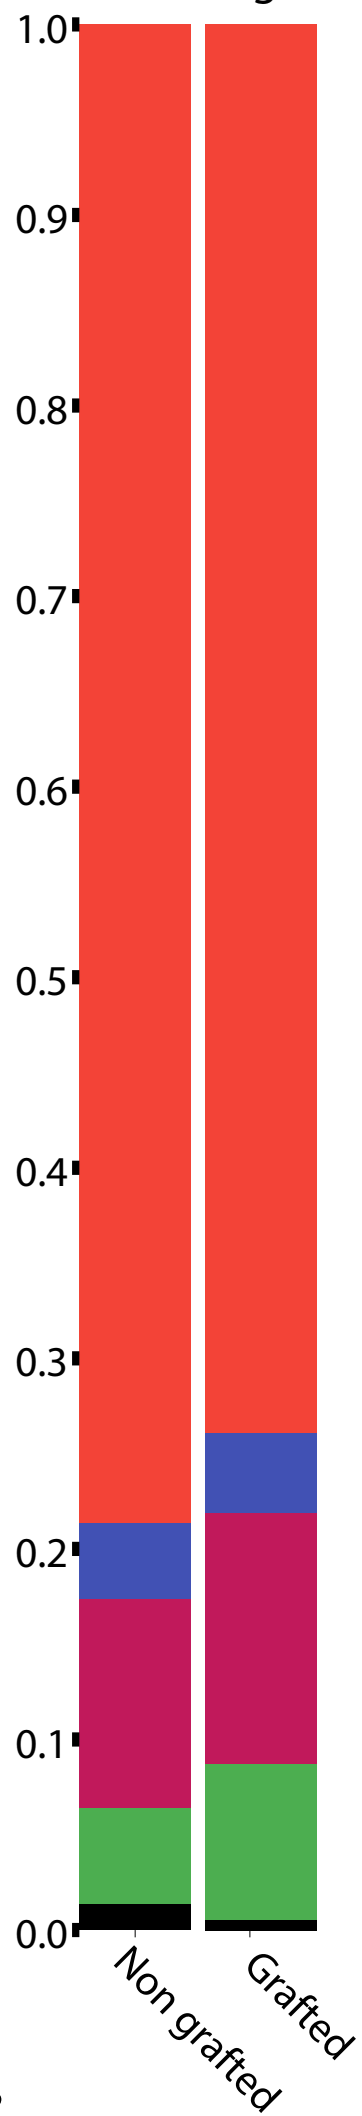

c) Variety

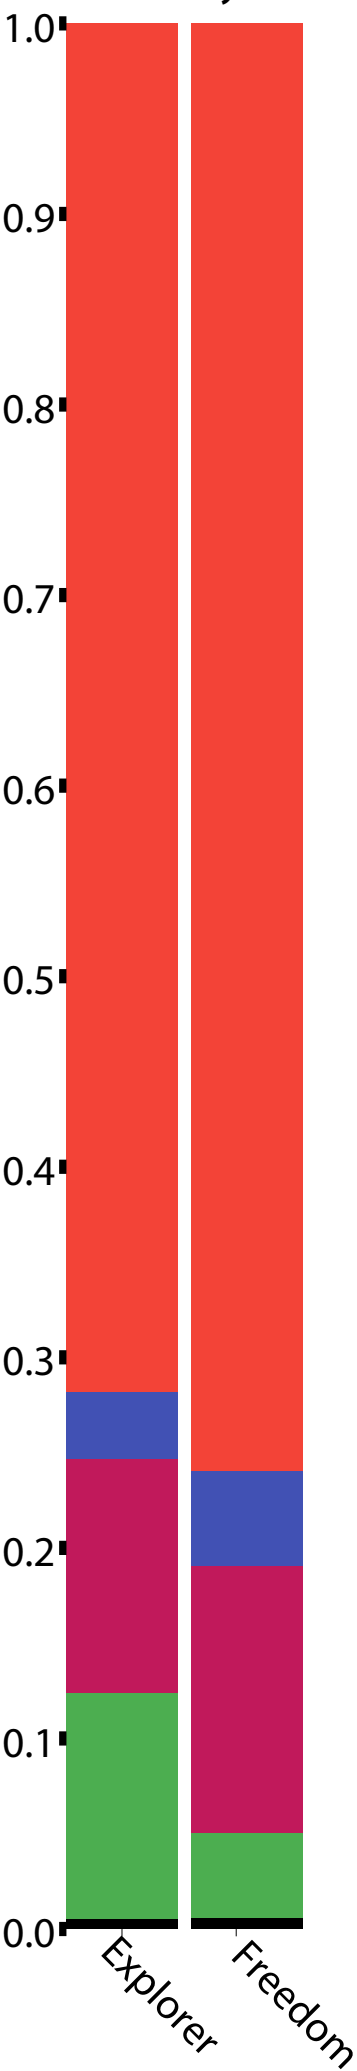

## Phylum

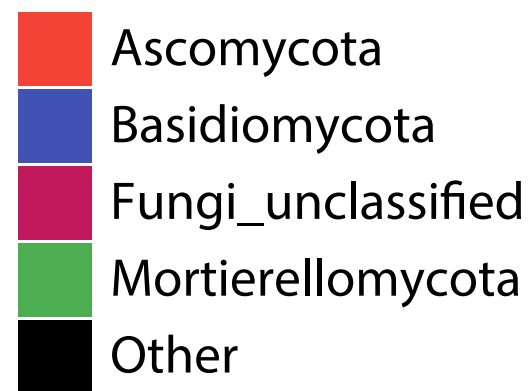

Supplement: s1 [file s1]
